# Supplementary material for: Development of Rapid Extraction Method of Mycobacterium avium Subspecies paratuberculosis DNA from Bovine Stool Samples
Source: MDPI journal article supplement (doi:10.3390/diagnostics9020036), 2019-03-29
Supplement: s1 [file s1]

Supplementary Figure S1

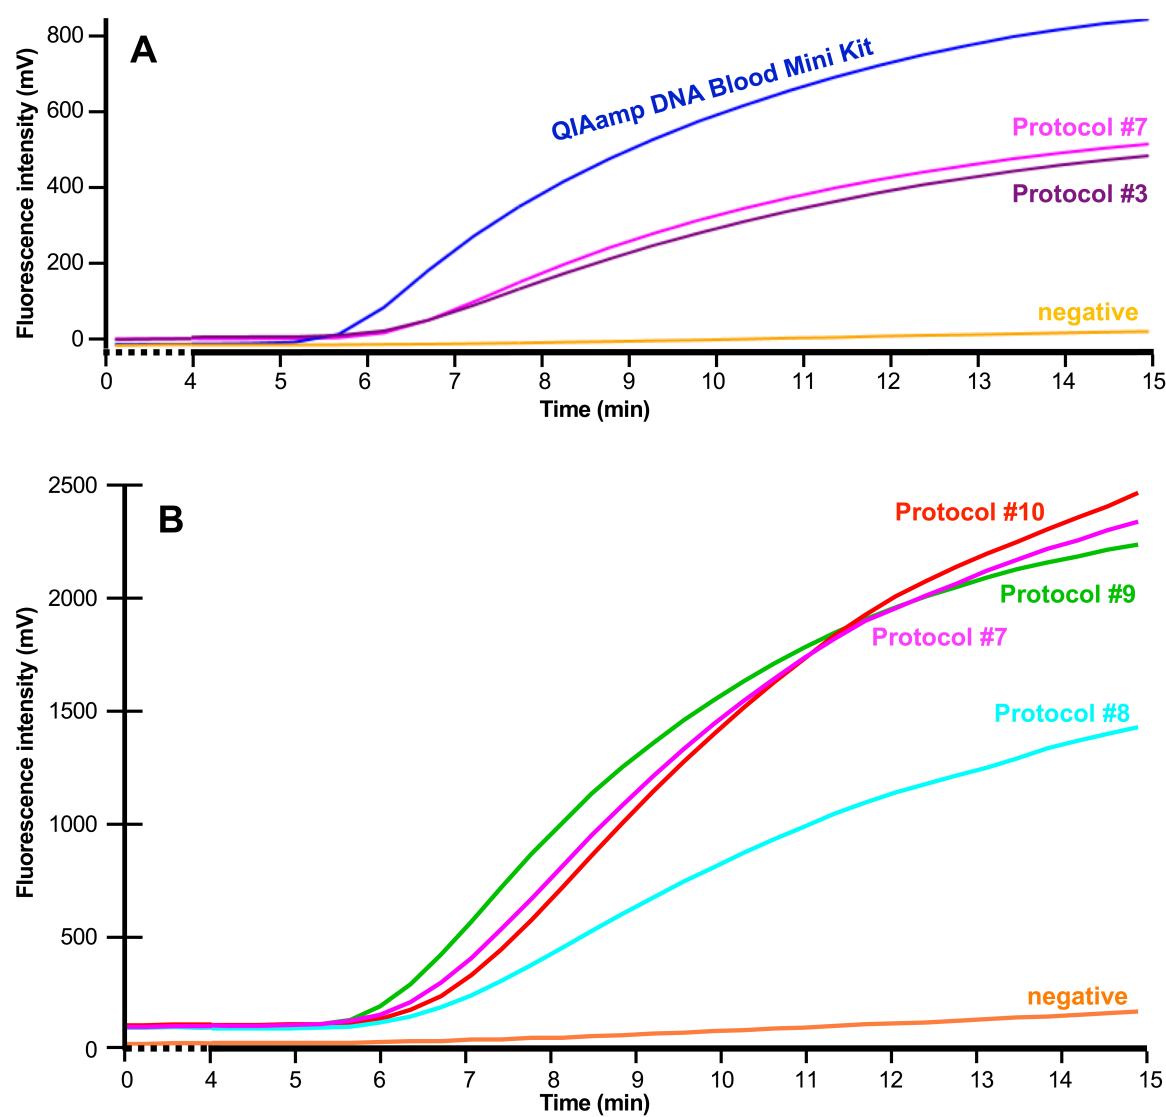

Figure S1. A: RPA results of DNA extracted either by the QIAamp DNA Mini Blood Kit (blue) or the MAP SpeedXtract protocol with use of Proteinase K (purple) and without (pink).  
B: Performance of the DNA extraction protocols #7 to #10.
